# Supplementary material for: Superoxide dismutating molecules rescue the toxic effects of PINK1 and parkin loss
Source: PubMed Central journal article supplement (PMC5905640; doi:10.1093/hmg/ddy069), 2018-02-24
Supplement: ddy069_pink1-suppl.pdf [file ddy069_pink1-suppl.pdf]

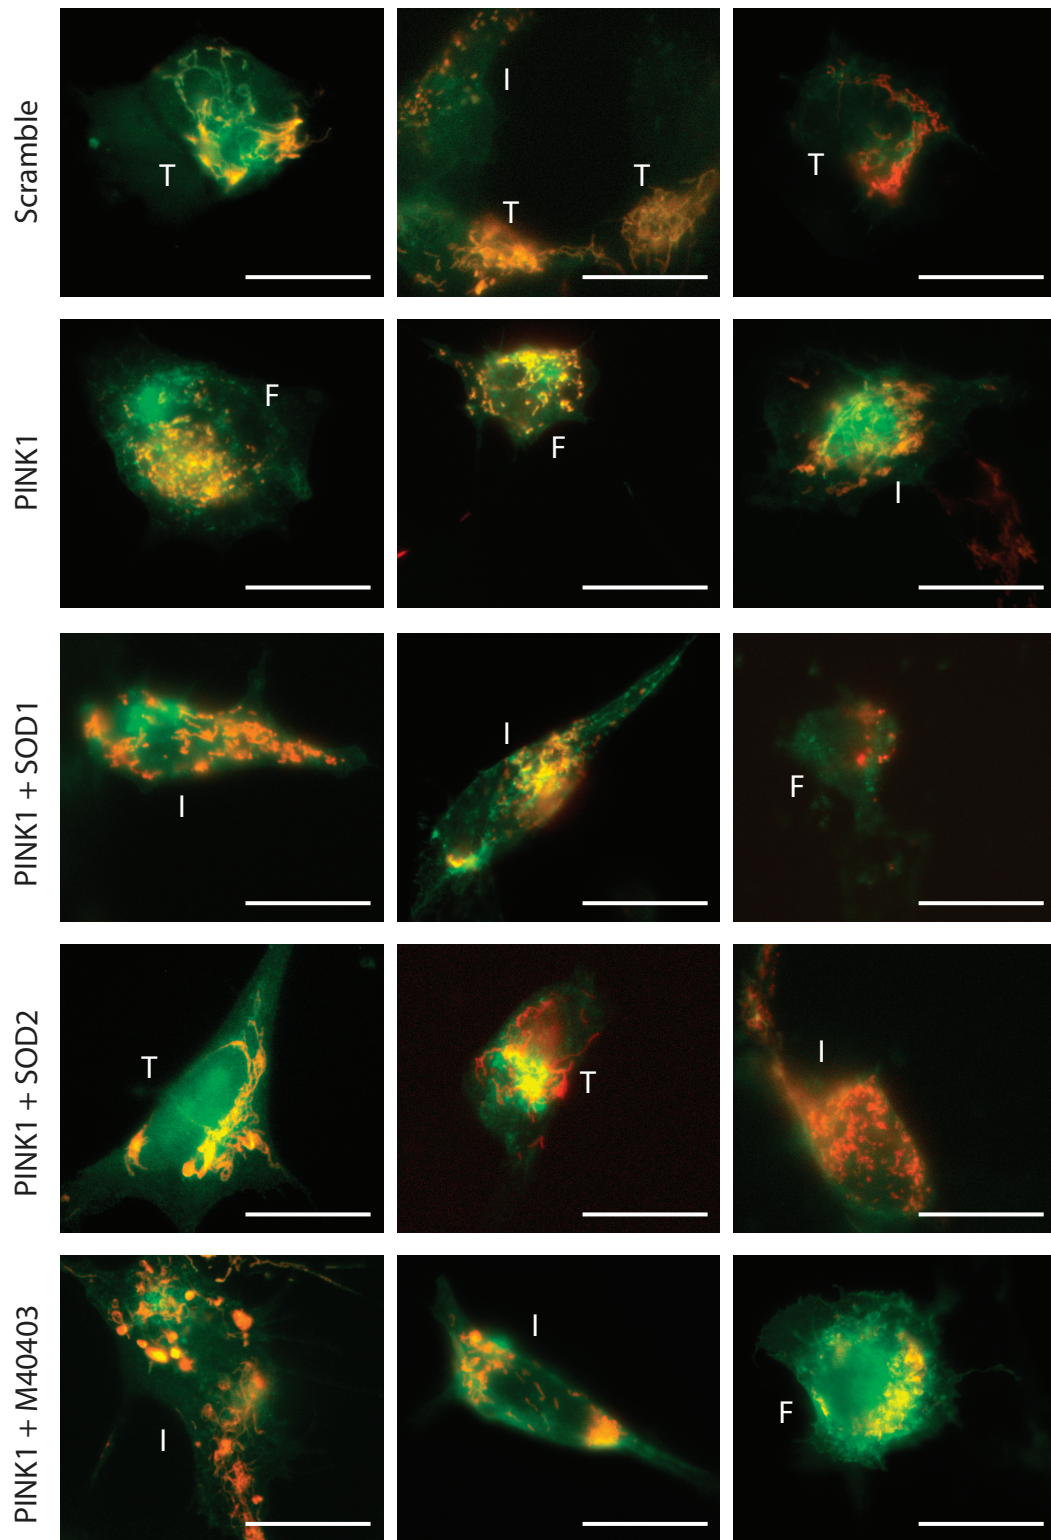

Supplementary Figure S1. Representative images of mitochondria morphology recorded in wild-type or SOD1 and SOD2 overexpressing SH-SY5Y cells transfected with scramble or CRISPR/Cas9-PINK1 vectors. Mitochondria are represented in red, the CD4 positive cells in green. Scale bar is 20  $\mu$ m. T: tubular mitochondria; I: intermediate mitochondria; F: fragmented mitochondria
